# Supplementary material
Source: publisher figshare collection journal article supplement (https://acs.figshare.com/ndownloader/files/4299349)
Supplement: Supplementary file 1 [file 4299349]

## Supporting Information

### Silver Nanomaterials Regulated by Structural Competition of G-/C-rich oligonucleotides

Yan Fu<sup>2</sup>, Jinli Zhang<sup>2</sup>, Xiongfei Chen<sup>2</sup>, Tiantian Huang<sup>2</sup>, Xiaoli Duan<sup>2</sup>, Wei Li<sup>1\*</sup>,

Jingkang Wang<sup>3</sup>

*1. Key Laboratory for Green Chemical Technology MOE, 2. Key Laboratory of  
Systems Bioengineering MOE, 3. School of Chemical Engineering & Technology,  
Tianjin University, Tianjin 300072, People's Republic of China*

\* To whom correspondence should be addressed.

Dr. Wei Li

Professor of Biochemical Engineering,

School of Chemical Engineering and Technology,

Tianjin University, Tianjin 300072, P.R. China

Tel: +86-22-27890643

Fax: +86-22-27890643

E-mail: liwei@tju.edu.cn

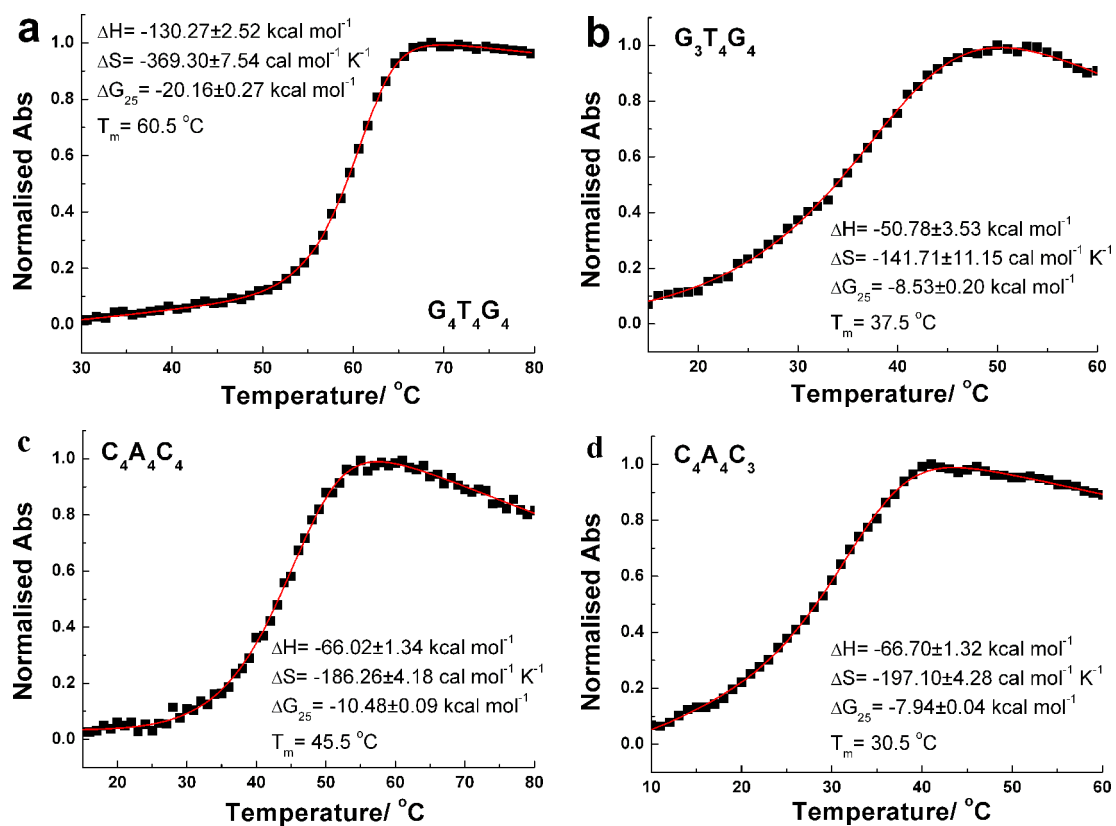

Figure S1. UV melting curves and non-linear least-squares fit of 20  $\mu\text{M}$  d[G<sub>4</sub>T<sub>4</sub>G<sub>4</sub>] (a), d[G<sub>3</sub>T<sub>4</sub>G<sub>4</sub>] (b) at pH 7.0, and d[C<sub>4</sub>A<sub>4</sub>C<sub>4</sub>] (c), d[C<sub>4</sub>A<sub>4</sub>C<sub>3</sub>] (d) at pH 5.0.

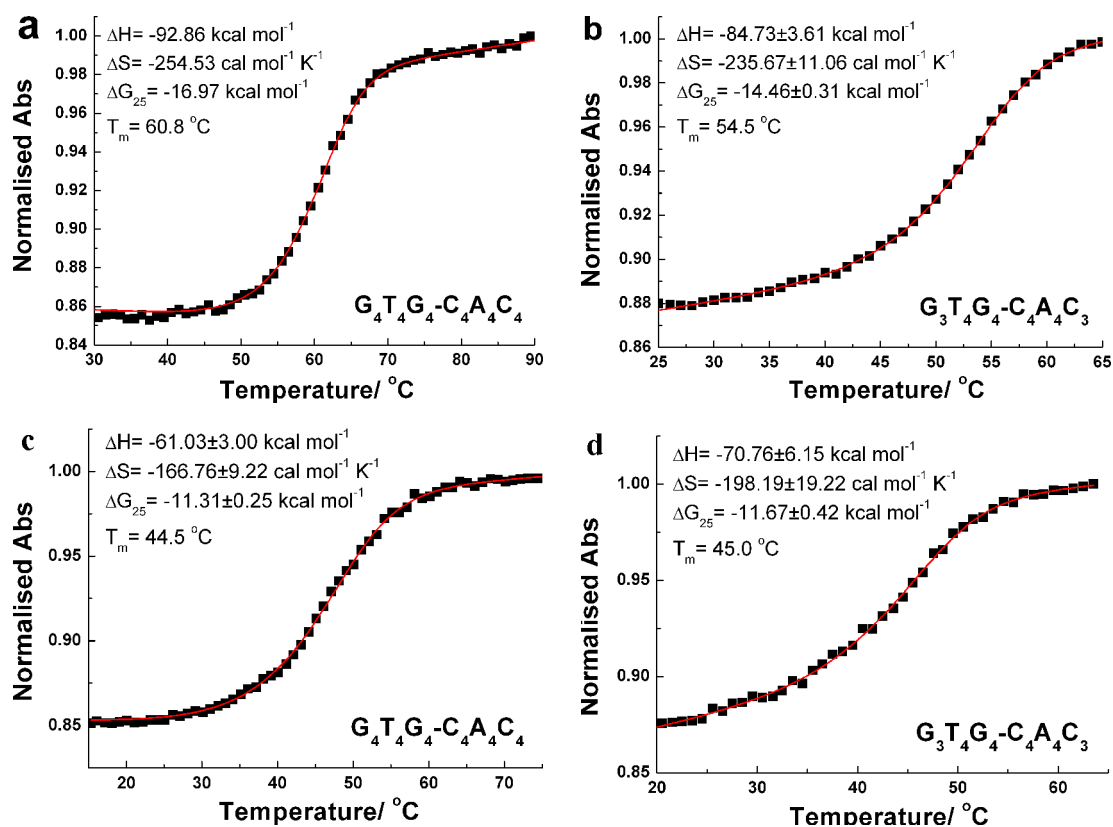

Figure S2. UV melting curves and non-linear least-squares fit of 20  $\mu\text{M}$  d[G<sub>4</sub>T<sub>4</sub>G<sub>4</sub>]-d[C<sub>4</sub>A<sub>4</sub>C<sub>4</sub>], d[G<sub>3</sub>T<sub>4</sub>G<sub>4</sub>]-d[C<sub>4</sub>A<sub>4</sub>C<sub>3</sub>] at pH 7.0 (a, b) and pH 5.0 (c, d).

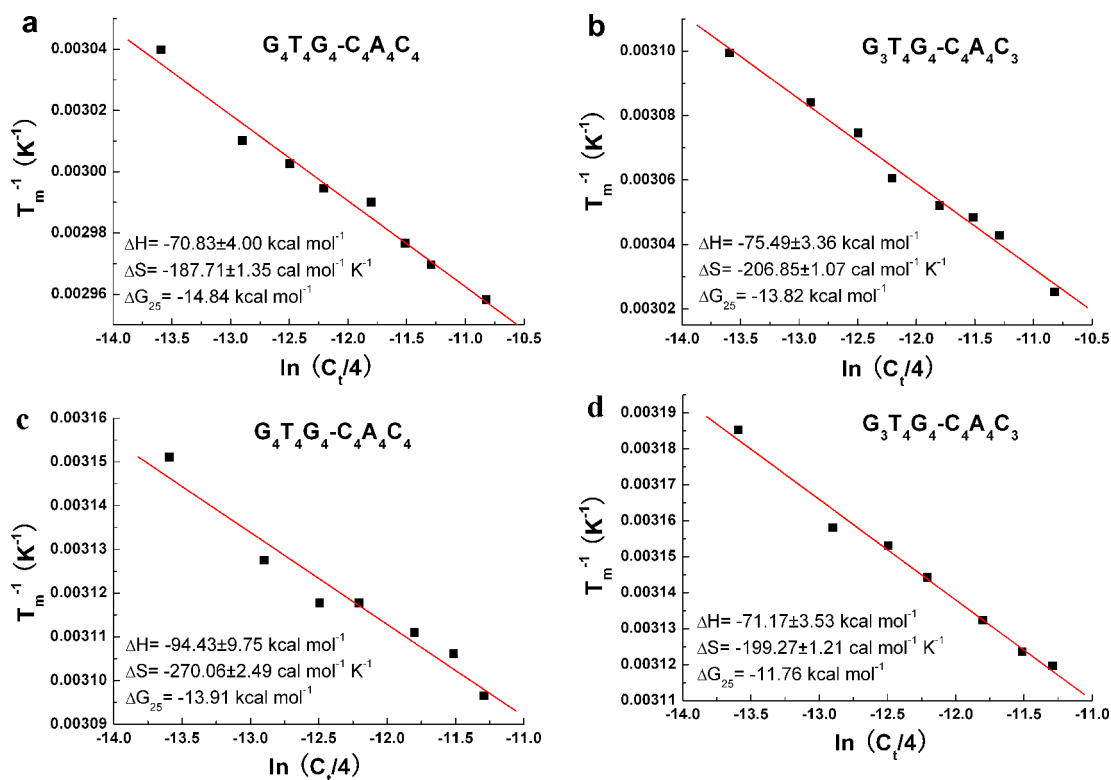

Figure S3. Plots of  $T_m^{-1}$  versus  $\ln(C_t/4)$ : d[G<sub>4</sub>T<sub>4</sub>G<sub>4</sub>]-d[C<sub>4</sub>A<sub>4</sub>C<sub>4</sub>], d[G<sub>3</sub>T<sub>4</sub>G<sub>4</sub>]-d[C<sub>4</sub>A<sub>4</sub>C<sub>3</sub>] at pH 7.0 (a, b) and pH 5.0 (c, d).

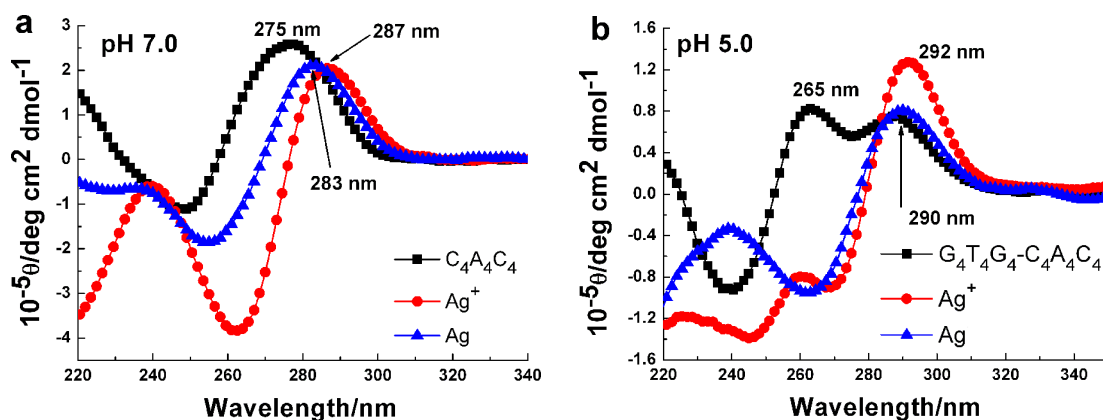

Figure S4. CD spectra of 20 μM d[C<sub>4</sub>A<sub>4</sub>C<sub>4</sub>] at pH 7.0 (a) and d[G<sub>4</sub>T<sub>4</sub>G<sub>4</sub>]-d[C<sub>4</sub>A<sub>4</sub>C<sub>4</sub>] at pH 5.0 (b) in the presence of 80 μM Ag<sup>+</sup> or Ag.

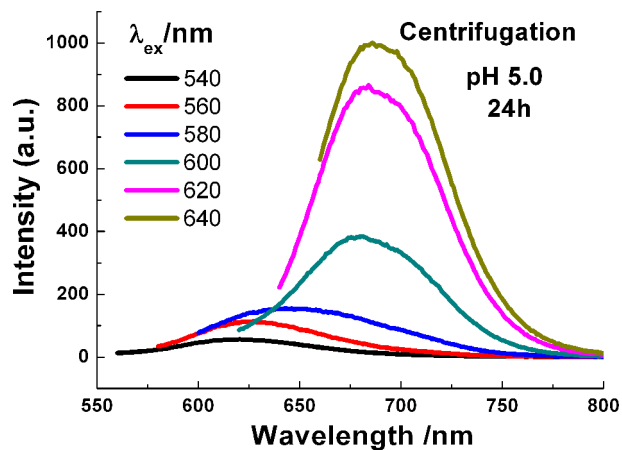

Figure S5. Fluorescence emission spectra of the centrifuged supernatant of 24 h-aged Ag-[G<sub>4</sub>T<sub>4</sub>G<sub>4</sub>] at pH 5.0.

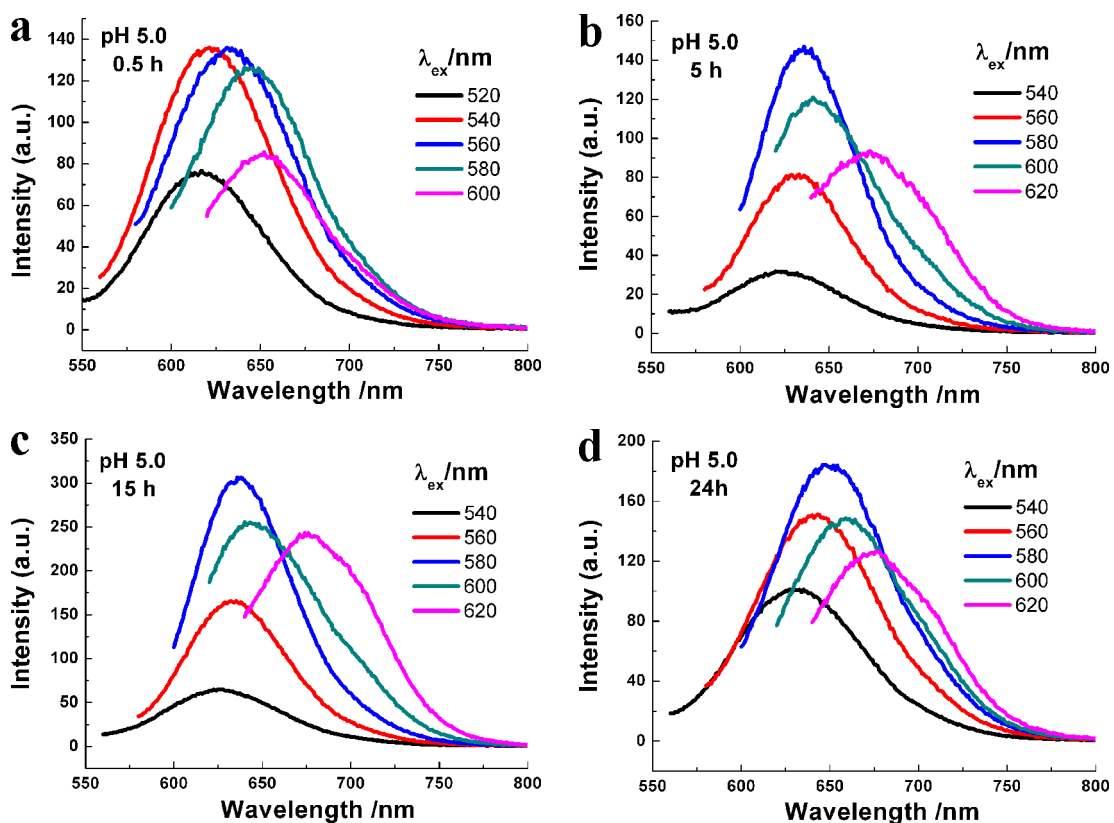

Figure S6. Fluorescence emission spectra of d[G<sub>3</sub>T<sub>4</sub>G<sub>4</sub>] at pH 5.0 in the presence of 80  $\mu$ M Ag<sup>+</sup> after reduction by 80  $\mu$ M BH<sub>4</sub><sup>-</sup> for 0.5 h (a), 5 h (b), 15 h (c), and 24 h (d) respectively.

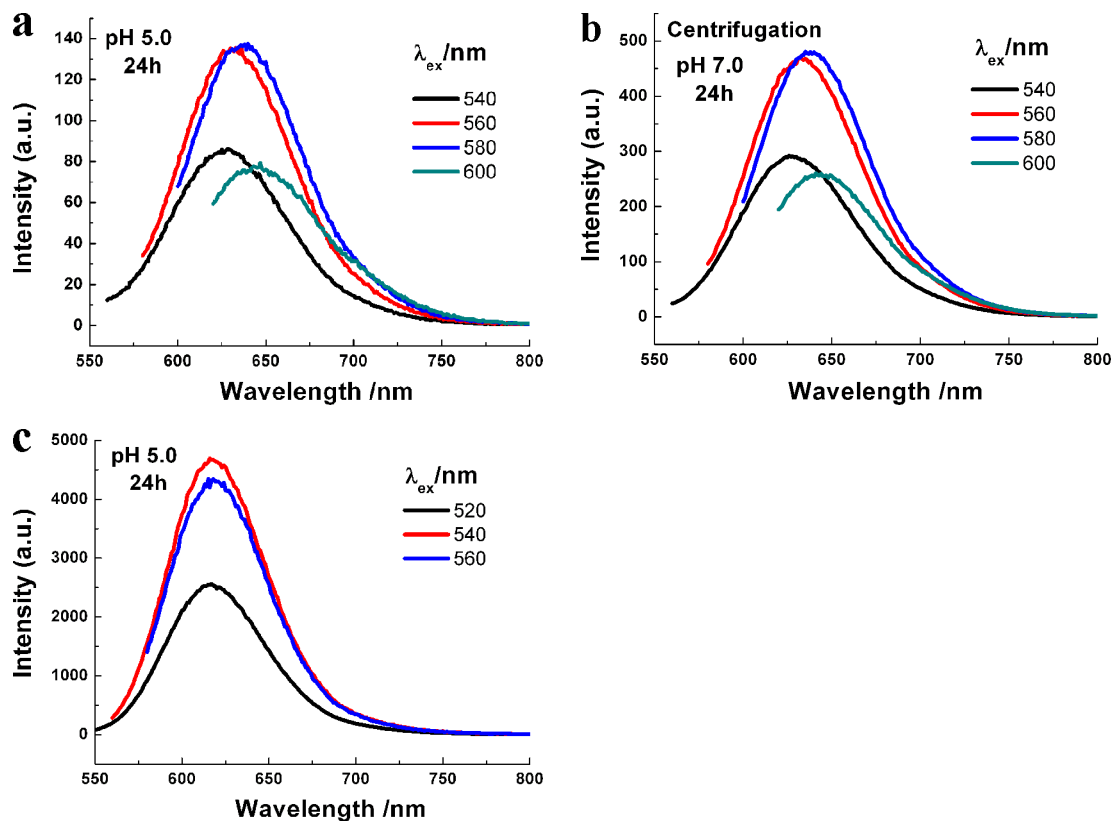

Figure S7. Fluorescence emission spectra of 24 h-aged Ag-d[C<sub>4</sub>A<sub>4</sub>C<sub>4</sub>] at pH 5.0 (a), the centrifugated supernatant of 24 h-aged Ag-d[C<sub>4</sub>A<sub>4</sub>C<sub>4</sub>] at pH 7.0 (b), as well as 24 h-aged Ag-d[C<sub>4</sub>A<sub>4</sub>C<sub>3</sub>] at pH 5.0 (c).

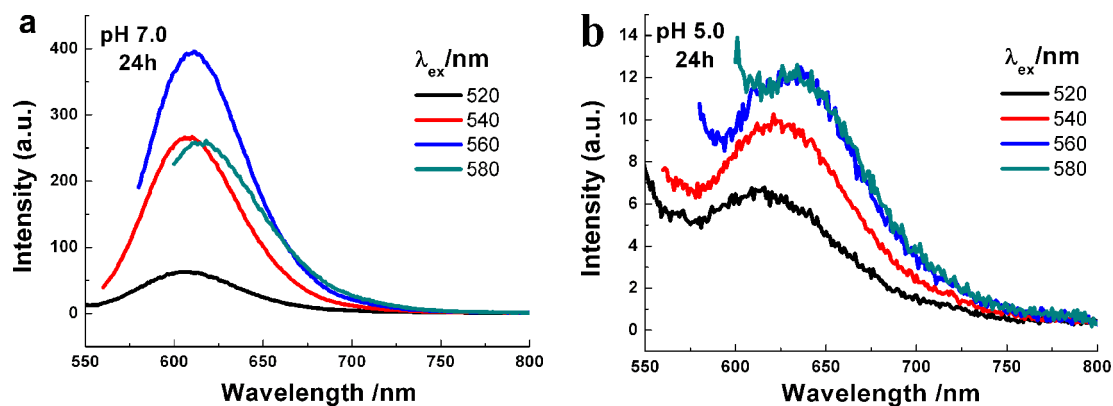

Figure S8. Fluorescence emission spectra of 24 h-aged Ag-d[C<sub>4</sub>A<sub>4</sub>C<sub>2</sub>] at pH 7.0 (a) and 5.0 (b).
